# Supplementary material
Source: MDPI journal article supplement (https://www.mdpi.com/2305-7084/4/3/51)
Supplement: s1 [file s1]

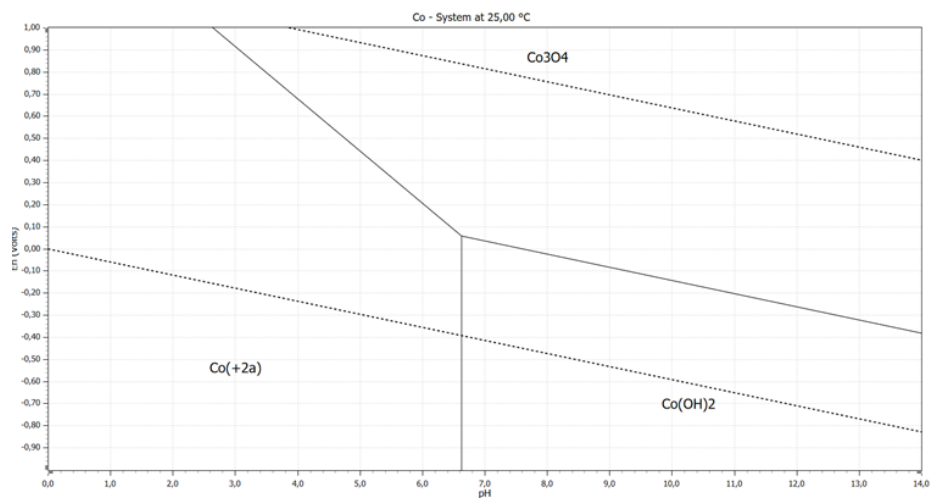

Figure S1. Eh-pH diagram of Co.

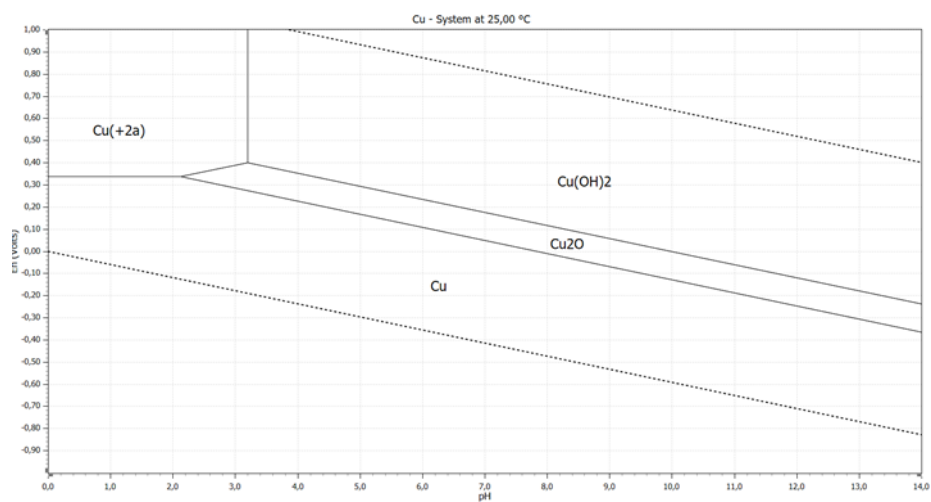

Figure S2. Eh-pH diagram of Cu.

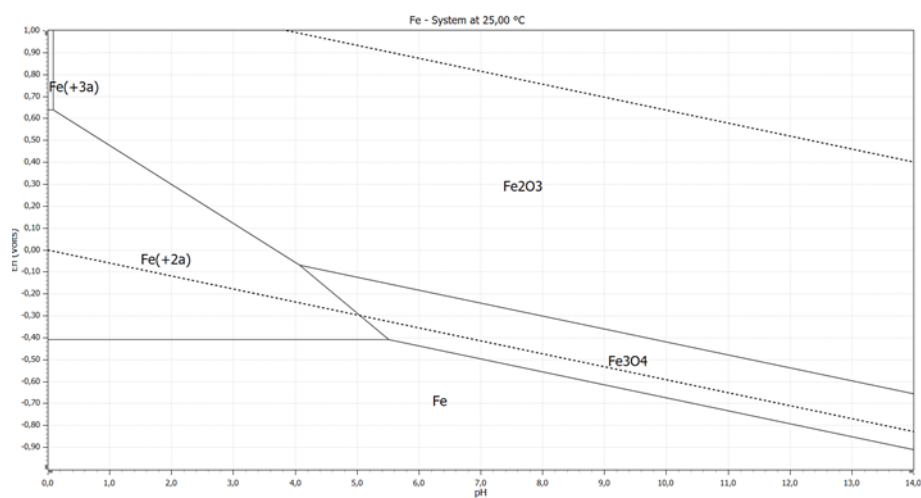

Figure S3. Eh-pH diagram of Fe.

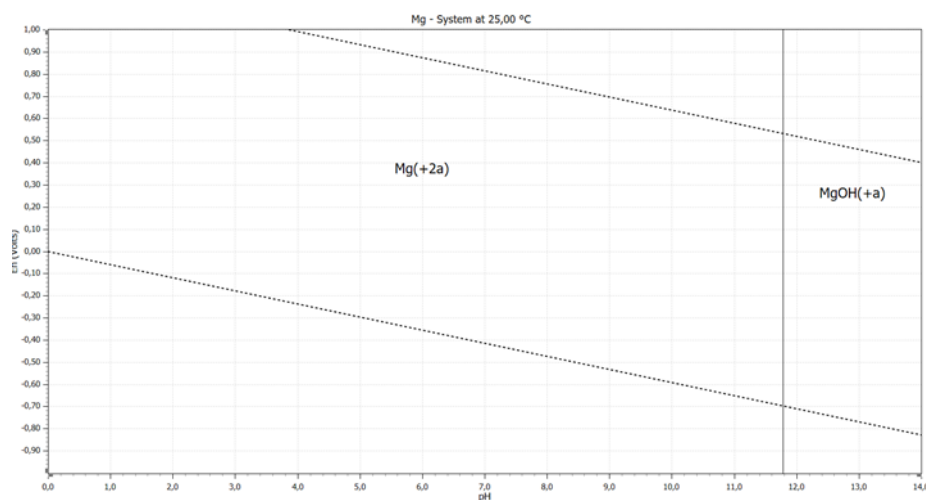

Figure S4. Eh-pH diagram of Mg

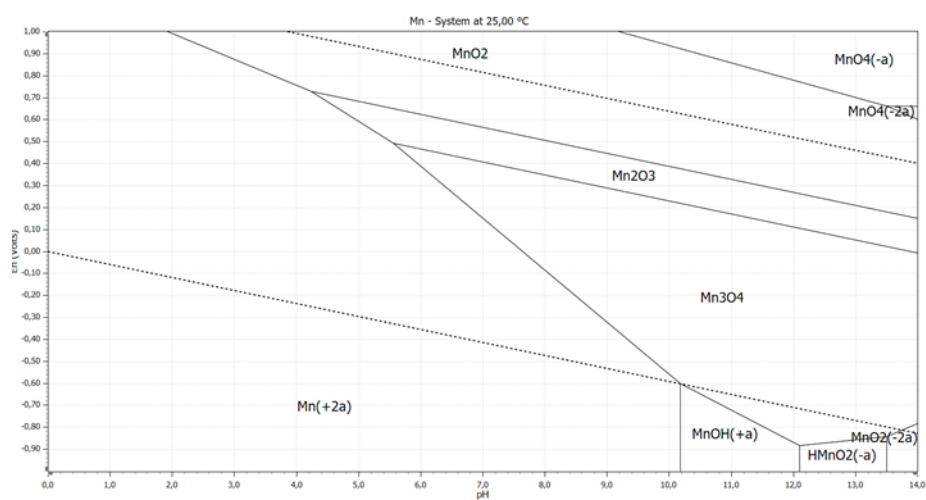

Figure S5. Eh-pH diagram of Mn

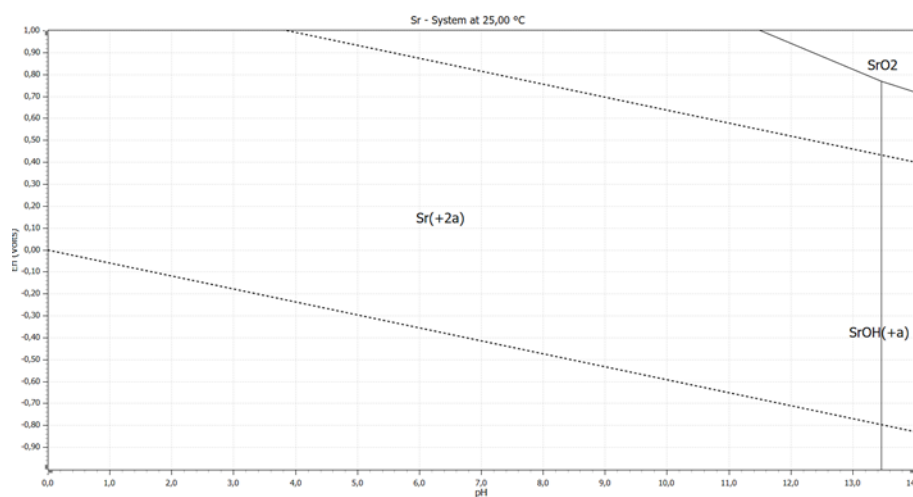

Figure S6. Eh-pH diagram of Sr.

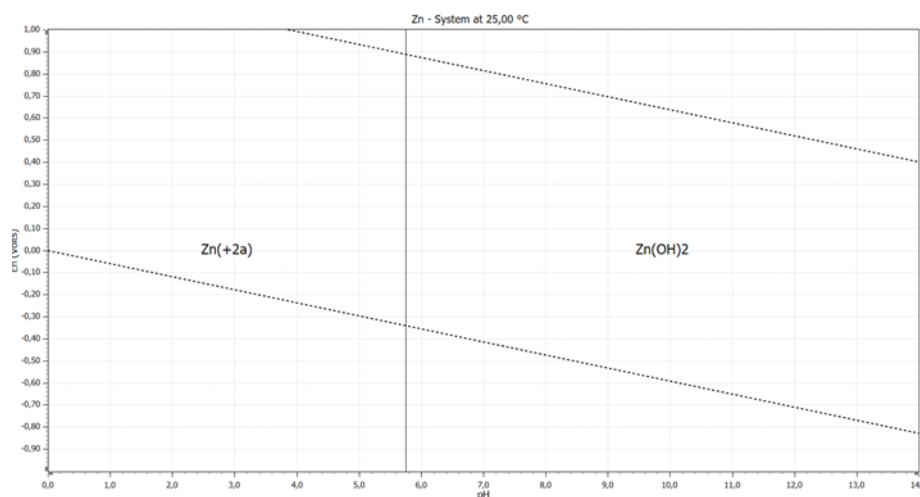

Figure S7. Eh-pH diagram of Zn.

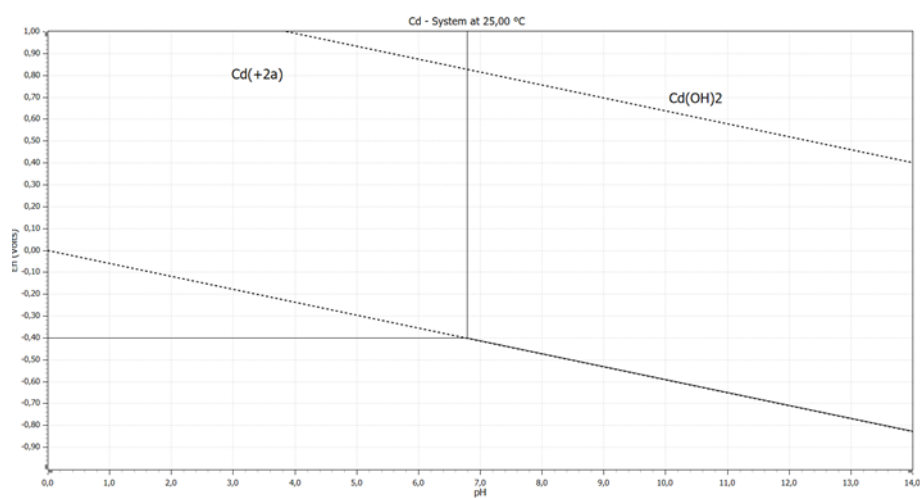

Figure S8. Eh-pH diagram of Cd.

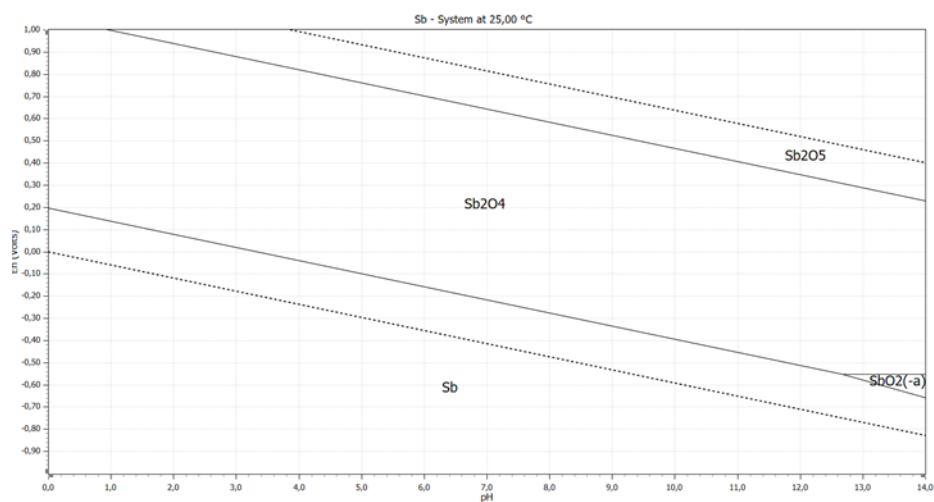

Figure S9. Eh-pH diagram of Sb.

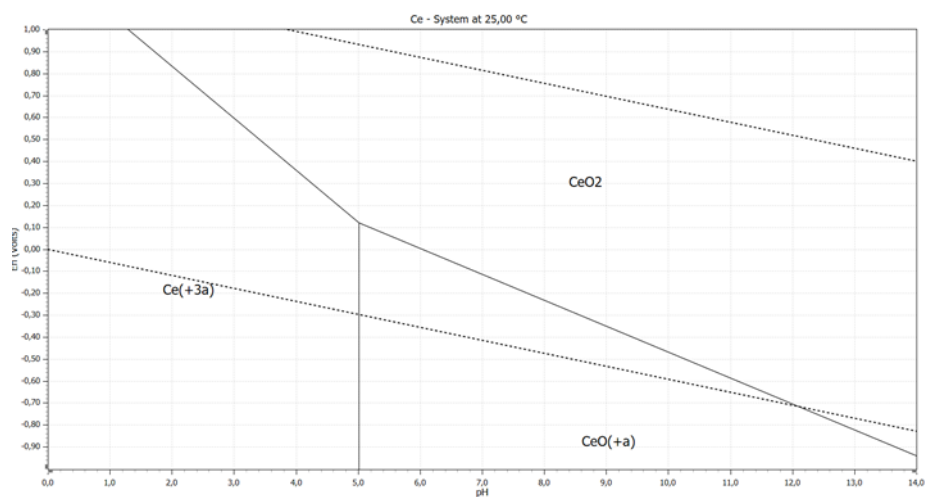

Figure S10. Eh-pH diagram of Ce.

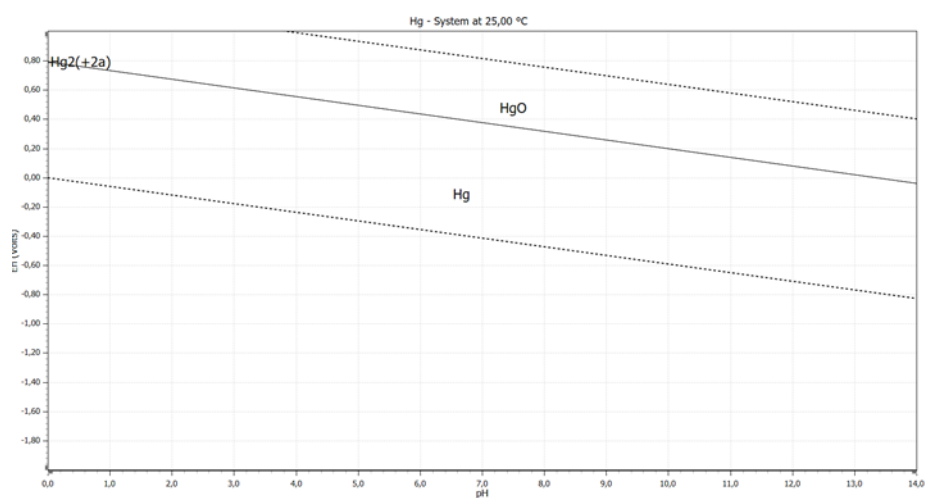

Figure S11. Eh-pH diagram of Hg.

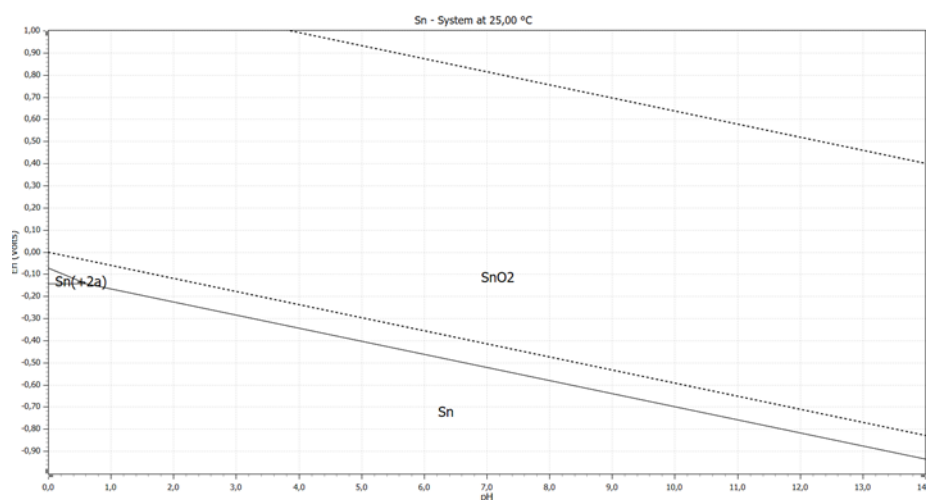

Figure S12. Eh-pH diagram of Sn.

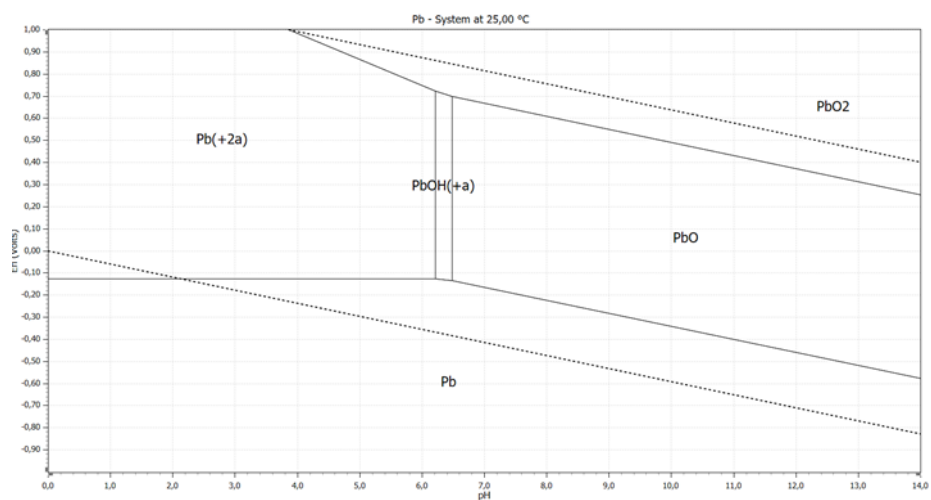

Figure S13. Eh-pH diagram of Pb.

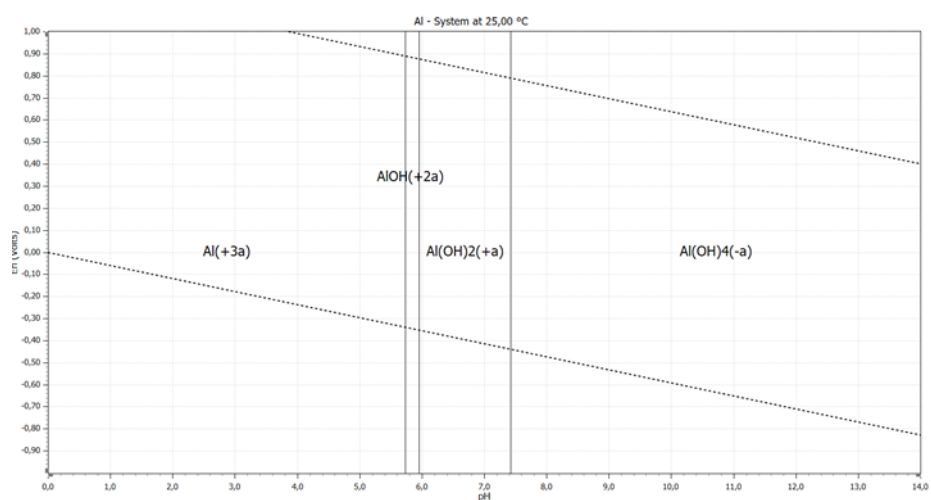

Figure S14. Eh-pH diagram of Al.

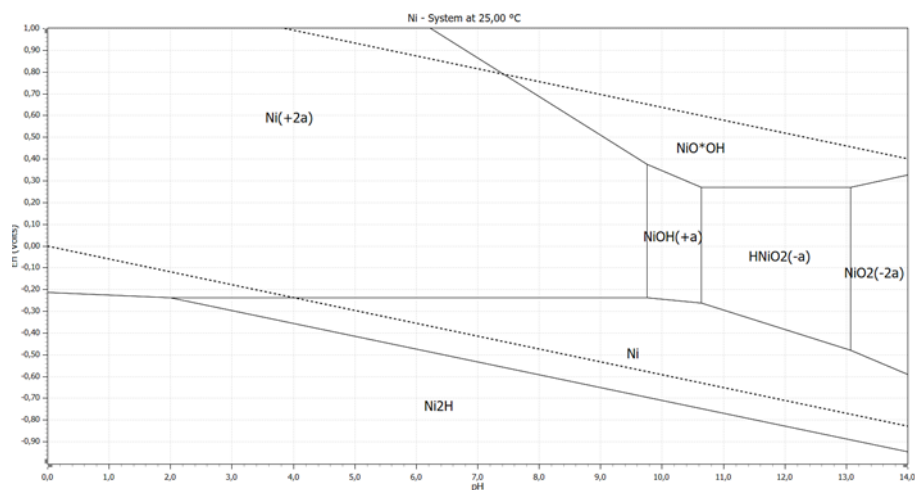

Figure S15. Eh-pH diagram of Ni.
